# Supplementary material
Source: PubMed Central journal article supplement (PMC8113080)
Supplement: NIHMS1670084-supplement-1.pdf [file NIHMS1670084-supplement-1.pdf]

**Supplementary Table E1:** Description of olfactory cleft mucus proteins for entire cohort (n=198)

|                               | All Case and Control Subjects (n=198) |                                     |                                    |                             |                  |                              |                               |
|-------------------------------|---------------------------------------|-------------------------------------|------------------------------------|-----------------------------|------------------|------------------------------|-------------------------------|
|                               | Sample N                              | Protein Concentration Mean $\pm$ SD | Protein Concentration Median [IQR] | Protein Concentration Range | Detectable N (%) | Above Detectable Limit N (%) | Below Detectable Limits N (%) |
| <b>CCL2</b>                   | 198                                   | 1933.5 $\pm$ 2610.8                 | 1155.5 [1449.2]                    | 193.7 – 21950.6             | 198 (100%)       | ----                         | ----                          |
| <b>CCL3</b>                   | 198                                   | 179.3 $\pm$ 737.2                   | 25.1 [97.8]                        | 2.2 – 7313.7                | 188 (94.9%)      | ---                          | 10 (5.1%)                     |
| <b>CCL5</b>                   | 198                                   | 271.5 $\pm$ 1782.1                  | 22.7 [59.9]                        | 4.9 – 23304.4               | 119 (60.1%)      | 1 (0.5%)                     | 78 (39.4%)                    |
| <b>CCL11</b>                  | 198                                   | 549.0 $\pm$ 488.7                   | 427.7 [482.4]                      | 13.0 – 3010.8               | 197 (99.5%)      | ----                         | 1 (0.5%)                      |
| <b>CCL20</b>                  | 198                                   | 1757.3 $\pm$ 4463.3                 | 321.7 [1001.5]                     | 13.5 – 29066.1              | 184 (92.9%)      | 4 (2.0%)                     | 10 (5.1%)                     |
| <b>CXCL1</b>                  | 198                                   | 7128.2 $\pm$ 4339.6                 | 5427.3 [5126.3]                    | 1751.3 – 22069.1            | 192 (97.0%)      | 6 (3.0%)                     | ----                          |
| <b>CXCL5</b>                  | 198                                   | 3663.4 $\pm$ 4457.0                 | 1998.0 [3655.8]                    | 65.0 – 24912.1              | 187 (94.4%)      | 11 (5.6%)                    | ----                          |
| <b>CXCL9</b>                  | 198                                   | 2881.1 $\pm$ 3564.6                 | 1493.1 [3002.1]                    | 9.1 – 16371.7               | 197 (99.5%)      | ----                         | 1 (0.5%)                      |
| <b>CXCL11</b>                 | 198                                   | 435.4 $\pm$ 2241.2                  | 67.5 [161.7]                       | 2.2 – 30507.5               | 175 (88.4%)      | 1 (0.5%)                     | 22 (11.1%)                    |
| <b>EGF</b>                    | 198                                   | 821.5 $\pm$ 740.1                   | 564.2 [702.9]                      | 78.6 – 5146.5               | 198 (100%)       | ----                         | ----                          |
| <b>bFGF</b>                   | 198                                   | 1683.2 $\pm$ 3598.8                 | 426.8 [1350.3]                     | 27.4 – 25410.1              | 198 (100%)       | ----                         | ----                          |
| <b>IgE</b>                    | 198                                   | 697.7 $\pm$ 1857.0                  | 135.5 [362.8]                      | 0.0 – 13267.2               | 186 (93.9%)      | ----                         | 12 (6.1%)                     |
| <b>IL2</b>                    | 198                                   | 21.1 $\pm$ 52.7                     | 8.0 [10.0]                         | 1.3 – 410.2                 | 77 (38.9%)       | ----                         | 121 (61.1%)                   |
| <b>IL4</b>                    | 198                                   | 8.9 $\pm$ 13.6                      | 5.8 [4.7]                          | 1.6 – 102.8                 | 131 (66.2%)      | ----                         | 67 (33.8%)                    |
| <b>IL5</b>                    | 198                                   | 609.8 $\pm$ 2020.1                  | 16.7 [458.8]                       | 2.3 – 22197.8               | 183 (92.4%)      | ----                         | 15 (7.6%)                     |
| <b>IL6</b>                    | 198                                   | 517.4 $\pm$ 1331.4                  | 128.4 [427.1]                      | 2.7 – 15311.2               | 198 (100%)       | ----                         | ----                          |
| <b>IL8</b>                    | 198                                   | 13812.3 $\pm$ 7152.2                | 12374.0 [10548.9]                  | 1392.1 – 39933.2            | 198 (100%)       | ----                         | ----                          |
| <b>IL9</b>                    | 198                                   | 27.9 $\pm$ 68.8                     | 6.0 [16.0]                         | 1.0 – 764.7                 | 149 (75.3%)      | ----                         | 49 (24.7%)                    |
| <b>IL10</b>                   | 198                                   | 18.5 $\pm$ 149.3                    | 2.7 [4.9]                          | 1.0 – 2059.4                | 139 (70.2%)      | ----                         | 59 (29.8%)                    |
| <b>IL13</b>                   | 198                                   | 134.5 $\pm$ 341.6                   | 28.3 [66.9]                        | 1.6 – 2814.0                | 160 (80.8%)      | ----                         | 38 (19.2%)                    |
| <b>IL17A</b>                  | 198                                   | 21.9 $\pm$ 134.6                    | 3.9 [11.1]                         | 0.5 – 1857.0                | 116 (58.6%)      | ----                         | 82 (41.4%)                    |
| <b>IL17F</b>                  | 198                                   | 17.9 $\pm$ 49.7                     | 4.8 [6.1]                          | 1.3 – 551.1                 | 127 (64.1%)      | ----                         | 71 (35.9%)                    |
| <b>IL23</b>                   | 198                                   | 9.6 $\pm$ 17.0                      | 5.7 [7.5]                          | 0.8 – 182.2                 | 190 (96.0%)      | ----                         | 8 (4.0%)                      |
| <b>IL33</b>                   | 198                                   | 3549.4 $\pm$ 13804.7                | 1005.3 [1960.6]                    | 14.3 – 14051.1              | 195 (98.5%)      | 2 (1.0%)                     | 1 (0.5%)                      |
| <b>TNF<math>\alpha</math></b> | 198                                   | 38.7 $\pm$ 267.5                    | 4.0 [10.6]                         | 1.0 – 3703.5                | 159 (80.3%)      | ----                         | 39 (19.7%)                    |
| <b>VEGF-A</b>                 | 198                                   | 4230.2 $\pm$ 1398.2                 | 4069.8 [1548.4]                    | 705.2 – 10730.2             | 198 (100%)       | ----                         | ----                          |

**LEGEND:** All reported protein concentrations are expressed in picograms per milliliter (pg./mL). SD, standard deviation; IQR, interquartile range; N, sample size; CCL, chemokine (C-C motif) ligand; CXCL, C-X-X motif chemokine; EGF, epidermal growth factor; bFGF, basic fibroblast growth factor; IgE, immunoglobulin E; IL, interleukin; TNF $\alpha$ , tumor necrosis factor alpha; VEGF-A, vascular endothelial growth factor-A.
